# Supplementary material for: Mortality in an Italian nursing home during COVID-19 pandemic: correlation with gender, age, ADL, vitamin D supplementation, and limitations of the diagnostic tests
Source: publisher site journal article supplement (doi:10.18632/aging.202307), 2020-12-22
Supplement: Supplementary file [file aging-v12i24-202307-supplementary-material-SD1.pdf]

## SUPPLEMENTARY TABLE

Supplementary Table 1. Activity of Daily Living (ADL) scores of the nursing home guests.

| Parameter                        | Sex | Mean  | SD    | Median |
|----------------------------------|-----|-------|-------|--------|
| <i>Barthel score</i><br>(0-100)  | M+F | 15.15 | 20.38 | 5      |
|                                  | M   | 16.44 | 21.71 | 5      |
|                                  | F   | 14.73 | 20    | 5      |
| <i>Tinetti score</i><br>(0-28)   | M+F | 5.66  | 7.29  | 1      |
|                                  | M   | 5.97  | 7.53  | 1      |
|                                  | F   | 5.57  | 7.24  | 1      |
| <i>S.O.S.I.A. score</i><br>(1-8) | M+F | 2.47  | 1.98  | 1      |
|                                  | M   | 2.52  | 1.72  | 3      |
|                                  | F   | 2.43  | 2.06  | 1      |

M: male; F: female.
